RESEARCH ARTICLE

# The Relationship between Central Visual Field Damage and Motor Vehicle Collisions in Primary Open-Angle Glaucoma Patients

Kenya Yuki<sup>1</sup>, Ryo Asaoka<sup>2\*</sup>, Kazuo Tsubota<sup>1</sup>

1. Department of Ophthalmology, Keio University School of Medicine, Tokyo, Japan, 2. Department of Ophthalmology, the University of Tokyo, Graduate School of Medicine, Tokyo, Japan

\*[rasaoka-ky@umin.ac.jp](mailto:rasaoka-ky@umin.ac.jp)

## Abstract

**Purpose:** To investigate the relationship between visual field (VF) damage and history of motor vehicle collisions (MVCs) in subjects with primary open-angle glaucoma (POAG).

**Methods:** MVC history and driving habits were recorded using patient questionnaires in 247 POAG patients. Patients' driving attitudes (carefulness) were estimated using Rasch analysis. The relationship between MVC outcomes and 52 total deviation (TD) values of integrated binocular VF (IVF), better and worse visual acuities (VAs), age and gender was analyzed using principal component analysis and logistic regression.

**Results:** 51 patients had the history of MVCs. Significant difference was observed between patients with and without history of MVCs only for: better VA, a single TD value in the superior-right VF, and the typical distance driven in a week (unpaired t-test,  $p=0.002$ ,  $0.015$  and  $0.006$ , respectively). There was not a significant relationship between MVCs and mean deviation (MD) of IVF ( $p=0.41$ , logistic regression). None of the principal components were significantly correlated with MVC outcome ( $p>0.05$ , polynomial logistic regression analysis). There was a significant relationship between IVF MD and Rasch derived Person parameter ( $R^2=0.023$ ,  $p=0.0095$ ). There was also a significant positive relationship between MVCs and the distance driven in a week ( $p=0.005$ , logistic regression).

**Conclusions:** In this study of POAG patients, MVCs were not related to central binocular VF damage. These results suggest the relationship between visual function and driving is not straightforward, and careful consideration should be given when predicting patients' driving ability using their VF.

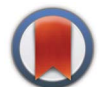

CrossMark  
click for updates

## OPEN ACCESS

**Citation:** Yuki K, Asaoka R, Tsubota K (2014) The Relationship between Central Visual Field Damage and Motor Vehicle Collisions in Primary Open-Angle Glaucoma Patients. PLoS ONE 9(12): e115572. doi:10.1371/journal.pone.0115572

**Editor:** Louis R. Pasquale, Harvard Medical School, United States of America

**Received:** September 4, 2014

**Accepted:** November 25, 2014

**Published:** December 29, 2014

**Copyright:** © 2014 Yuki et al. This is an open-access article distributed under the terms of the [Creative Commons Attribution License](https://creativecommons.org/licenses/by/4.0/), which permits unrestricted use, distribution, and reproduction in any medium, provided the original author and source are credited.

**Data Availability:** The authors confirm that all data underlying the findings are fully available without restriction. All relevant data are included in the Supporting Information files.

**Funding:** RA (Japan Science and Technology Agency (JST) CREST and KAKENHI Grant 26462679). The funders had no role in study design, data collection and analysis, decision to publish, or preparation of the manuscript.

**Competing Interests:** The authors have declared that no competing interests exist.

## Introduction

Glaucoma is the second leading cause of blindness in the world, affecting approximately 60 million people [1]. It is a disease characterized by progressive retinal ganglion cell loss concomitant with peripheral and central visual field (VF) damage. Age is a significant risk factor for glaucoma [2]. The increase in the number of elderly people living in developed and developing countries combined with the fact that glaucoma is irreversible means there are an ever-growing number of drivers with glaucomatous VF defects.

Motor vehicle collisions (MVCs) are a serious public health concern. According to the United States Census Bureau, the number of police-reported traffic collisions exceeds 10,000,000 a year, and were the cause of 35,000 deaths in 2009 alone [3].

Many previous reports have investigated the relationship between visual function and MVCs [4–8]. Most of these studies analyzed the relationship between MVCs and summary measures, such as visual acuity (VA) and mean deviation (MD). However, it has been reported that specific VF regions are important for different tasks and affect hand-eye coordination [9], postural stability [10], risk of falling [4], and risk of fractures [11]. Indeed Murata et al. recently reported that interpreting point-wise VF sensitivity and VA together in the same statistical model resulted in a more accurate prediction of patients' disability in their daily lives [12]. Furthermore, Crabb et al. monitored patients' eye movements during driving simulations and reported that deterioration in the superior peripheral area of the binocular integrated visual field (IVF) could affect driving performance [13]. However, no study has investigated the relationship between point-wise VF sensitivities and history of MVCs in the real world. Thus, the aim of this study is to investigate IVF defects and their association with MVCs in subjects with primary open angle glaucoma (POAG).

## Methods

The study was approved by the Research Ethics Committee of the Keio University School of Medicine. Written informed consent was obtained from all subjects after explanation of the nature and possible consequences of the study. The study was performed according to the tenets of the Declaration of Helsinki.

### Study Design and Subject Enrollment

A total of 601 patients who visited Keio University Hospital (Tokyo, Japan), Iidabashi Eye Clinic (Tokyo, Japan) or Tanabe Eye Clinic (Yamanashi, Japan) between May 2011 and November 2011 were screened for eligibility by means of an ophthalmic examination that included slit-lamp biomicroscopy, funduscopy, gonioscopy, intraocular pressure measurements with Goldmann applanation tonometry, and VF examination with the Humphrey Field Analyzer (HFA, Carl Zeiss Meditec, Dublin, CA), using the 24–2 Swedish Interactive Threshold

**Algorithm Standard Strategy.** Patients with ophthalmological diseases that could compromise VA or cause VF loss, such as cataract (except for insignificant senile change) were excluded. Patients with angle closure glaucoma, secondary glaucoma, age-related macular degeneration, diabetic retinopathy, and any fundus disease apart from POAG were also excluded. The eligible age was restricted to patients older than 40 years and less than 85 years. Of the 601 subjects screened, 230 were ineligible ([S1 Table](#) lists the reasons for exclusion). The purpose and methodology of the study were explained to every patient who met the inclusion criteria, and all patients agreed to participate. Answers to the driving questionnaire (details given below) were analyzed in a masked fashion, to avoid any observation bias.

### Diagnosis of POAG

POAG was diagnosed in 371 patients on the basis of the presence of the following three findings: (1) glaucomatous optic cupping represented by notch formation, generalized enlargement of cupping, senile sclerotic disc or myopic disc, or nerve fiber layer defects confirmed by glaucoma specialists (K.Y., and S.T.; see Acknowledgements) on fundus examination; (2) typical glaucomatous VF defects, such as Bjerrum scotoma, nasal step, or paracentral scotoma, compatible with optic disc appearance; and (3) an open, nonoccludable angle observed on gonioscopy.

### Questionnaire Regarding History of MVCs, Distance Driven in a Week and Attitudes towards Driving

All participants answered a questionnaire with the following questions (translated from Japanese):

- (1) Do you have a driver's license? (Yes/No/Previously)
- (2) How long have you driven/did you drive a car? (years)
- (3) How far did you drive during the past one week? (km)
- (4) Have you been involved in any traffic accidents, including single-car accidents or minor accidents, in the past five years? (Yes/No)
- (5) Please circle any of the following driving situations that you avoid: at night (avoid night), in rain (avoid rain), in fog (avoid fog), on highways (avoid highways), high-speed driving (avoid high speed), lane changing (avoid lane change), driving close to the car in front (car distance). These questions were modified from the Driving Habits Questionnaire (DHQ) [[14](#), [15](#)]. Participants were also asked for their age and sex.

### Integrated Visual Field

A binocular IVF was calculated for each patient by merging a patient's monocular HFA VFs using the 'best sensitivity' method [[16–19](#)], where each TD value in the IVF is calculated using the maximum total deviation (TD) value (least negative)

from each of the two overlapping points, as if the subject was viewing binocularly. IVF MD was calculated as the mean of all 52 TD values across the IVF.

## Statistical Analysis

Descriptive demographic statistics were calculated for the study patients. Age, better and worse VAs, and glaucoma severity defined by Mills glaucoma severity scale [20], and TD values of the 52 test points in the IVF were compared between patients with a history of MVCs and patients without a history of MVCs, using the non-paired t-test and chi square test.

The relationship between MVCs and IVF MD was investigated using Pearson's correlation. Then, in order to further analyze the relationship between MVCs and the VF in more detail, principal component analysis (PCA) was carried out to investigate the influence of all 52 IVF TD values, better eye and worse eye VAs, age and gender on MVCs. PCA developed by Karl Pearson in 1901 [21] is a statistical method to describe patterns of variation in multivariate data sets with correlated predictors. It has been reported that the sensitivities of VF test points in the central VF are strongly correlated with VA [22] and also that there is a close relationship between neighboring VF test points [23–25]. In PCA, observations from possibly correlated variables are analyzed as orthogonal 'principal components', which avoids the problem of multicollinearity [26]. In the current study, the number of meaningful principal components was decided based on the point at which the cumulative variance reached 90% [27]. Finally, the relationship between these principal components and the history of MVCs was investigated using a polynomial logistic regression model.

In addition, the attitudes of patients towards driving (the answers to question 5): "avoid night", "avoid rain", "avoid fog", "avoid highway", "avoid high speed", "avoid lane change", "car distance" were analyzed using the Rasch model so that an index of what lengths a patient goes to in order to avoid traffic accidents could be derived (the 'Person parameter'). Rasch Analysis is a special case of item response theory (IRT), whereby items and persons can be scaled according to a series of responses to different questions [28]. Rasch analysis places items and persons on a linear scale and provides the infit statistic to indicate how well different items describe the group of subjects and how well individual subjects fit the group [29, 30]. The infit statistic is calculated as mean square standardized residuals. An item infit less than 0.7 suggests redundancy, and values higher than 1.3 suggest unacceptable levels of noise in the responses and misfitting [31]; however, values between 0.5 and 1.5 may be considered productive for measurement [32]. Thus, the Rasch model provides a robust analysis of the validity of outcome measures [33], and indeed there are an increasing number of recent studies which have used Rasch analysis for testing instrument validity and applicability [34–41]. Unidimensionality was assessed using the 95% confidence interval (CI) of the residuals of PCA by carrying out bootstrapping (10,000 iterations). Unidimensionality indicates that a score produced by a measure represents a single concept [42] while multidimensionality indicates there is

evidence of an additional component captured by the items [32,43]. In PCA, an eigenvalue greater than 2.00 U is suggestive of a second construct being measured, indicating a multidimensional instrument [36].

Following construction of the Rasch model, the relationship between the Rasch derived-Person parameter and MVCs was investigated using logistic regression. Furthermore, the relationship between the Person parameter and a patient's IVF MD was analyzed using Pearson's correlation.

Finally, the relationship between the distance driven by a patient in a single week and history of MVCs was analyzed using logistic regression. The relationship between distance driven and the Rasch derived-Person parameter was also analyzed using Pearson's correlation.

All statistical analyses were carried out using the statistical programming language R (ver. 2.15.0, The R Foundation for Statistical Computing, Vienna, Austria) and Medcalc version 11.4.2.0; MedCalc statistical software, Mariakerke, Belgium). The R package 'eRM' was used to carry out analyses associated with the Rasch analysis, 'stats' was used to carry out PCA and the package 'eigenprcomp' was used to calculate the 95% CI of the PCA residuals. P values were adjusted for multiple comparisons using Benjamini's method [44].

## Results

Among 371 surveyed POAG patients, 73 patients did not have a driving license and 15 patients had given up driving (9 patients due to a fear of MVCs, 3 patients because of old age, 1 patient who had forgot to renew his/her driving license and a further 2 patients for unknown reasons). Of the remaining 283 driving patients, 247 supplied answers to the questions regarding MVC history and attitudes towards driving; the thirty-six subjects who did not supply answers were excluded because they did not actually drive. Subsequent analyses were therefore carried out using only data obtained from these 247 patients. The characteristics of these patients are summarized in [Table 1](#). There were a large number of male subjects in our sample most likely reflecting the fact that more male Japanese drive.

In the 247 studied patients, 51 patients experienced MVCs ('MVC+' group) and 196 patients had no history of MVCs ('MVC-' group). The comparisons of age, better eye and worse eye VAs between these two groups are shown in [Table 2](#). Comparisons of IVF TD values between the MVC+ and MVC- groups are shown in [Table 3](#). Significant differences were observed only for better eye VA (unpaired t-test with Benjamini's correction for multiple comparisons,  $p=0.032$ ). There was not a significant relationship between MVCs and better eye VA, worse eye VA and IVF MD (logistic regression,  $p=0.98$ , 0.24 and 0.41, respectively).

In the PCA model, cumulative variance reached 90% with 17 principal components (see [Table 4](#)). None of these 17 principal components was significantly correlated with the MVC in the polynomial logistic regression analysis.

**Table 1.** Subjects demographics.

| 247 POAG patients                      |                |             |
|----------------------------------------|----------------|-------------|
| Gender (male:female)                   | 172:75         |             |
| Age (years old) mean ± s.d. [range]    | 63.7 ± 10.6    | [40–84]     |
| Better VA (LogMar) mean ± s.d. [range] | 0.0034 ± 0.017 | [0.0–0.15]  |
| Worse VA (LogMar) mean ± s.d. [range]  | 0.014 ± 0.037  | [0.0–0.15]  |
| Better MD (dB) mean ± s.d. [range]     | −2.6 ± 3.9     | [−20.1–2.2] |
| Worse MD (dB) mean ± s.d. [range]      | −7.2 ± 6.5     | [−27.2–0.9] |
| IVF-MD (dB) mean ± s.d. [range]        | −1.8 ± 3.6     | [−20.3–3.2] |

**Abbreviations.**

POAG: primary open angle glaucoma, s.d.: standard deviation, VA: visual acuity, LogMar: the logarithm of the minimum angle of resolution, MD: mean deviation, dB: decibel, IVF: integrated visual field.

doi:10.1371/journal.pone.0115572.t001

All of the infit statistics associated with the Rasch analysis were constructive (values varied between 0.69 and 1.1). The eigenvalues of the PCA components obtained with the residuals of the Rasch analysis varied from 0.00002 to 2.1 and

**Table 2.** Comparison of various visual function measures and person variables between the patients with and without a history of MVCs.

|                                                                | MVC+ (mean ± s.d.)                  | MVC- (mean ± s.d.)                   | p value |
|----------------------------------------------------------------|-------------------------------------|--------------------------------------|---------|
| Age                                                            | 62.1 ± 10.6                         | 64.1 ± 10.5                          | 0.64    |
| Better VA (LogMar)                                             | 0.000 ± 0.000                       | 0.004 ± 0.020                        | 0.036*  |
| Worse VA (LogMar)                                              | 0.010 ± 0.020                       | 0.020 ± 0.040                        | 0.60    |
| Gender (male:female)                                           | 37:14                               | 135:61                               | 0.86    |
| Distance driven per week (km)                                  | 148.2 ± 204.6                       | 73.2 ± 121.2                         | 0.14    |
| IVF MD (dB)                                                    | −0.6 ± 3.4                          | −0.8 ± 3.7                           | 0.67    |
| Better MD (dB)                                                 | −3.0 ± 3.8                          | −2.5 ± 4.0                           | 0.68    |
| Worse MD (dB)                                                  | −8.1 ± 7.3                          | −6.9 ± 6.3                           | 0.64    |
| Better eye glaucoma severity <sup>#</sup><br>(0/1/2/3 or more) | 6/37/5/3 (11.8%/72.5%/9.8%/5.9%)    | 40/129/18/9 (20.4%/65.8%/9.2%/4.6%)  | 0.86    |
| Worse eye glaucoma severity <sup>#</sup><br>(0/1/2/3 or more)  | 1/24/12/14 (2.0%/47.1%/23.5%/27.4%) | 5/107/48/36 (2.6%/54.6%/24.5%/18.3%) | 0.86    |
| Avoid night                                                    | 12 (23.5)                           | 64 (32.7)                            | 0.64    |
| Avoid rain                                                     | 6 (11.8)                            | 43 (21.9)                            | 0.61    |
| Avoid fog                                                      | 7 (13.7)                            | 32 (16.3)                            | 0.86    |
| Avoid highway                                                  | 4 (7.8)                             | 31 (15.8)                            | 0.64    |
| Avoid high speed                                               | 25 (49.0)                           | 111 (56.6)                           | 0.67    |
| Avoid lane change                                              | 6 (11.8)                            | 24 (12.2)                            | 0.93    |
| Car distance                                                   | 25 (49.0)                           | 90 (45.9)                            | 0.86    |
| Person parameter                                               | −0.3 ± 1.6                          | −0.6 ± 1.5                           | 0.61    |

<sup>#</sup> Glaucoma severity was categorized using Mills Glaucoma Staging system [20].

Chi square test was used for the variable of gender and unpaired t-test was used for other comparisons.

\*represents p < 0.05 with Benjamini's correction [44].

**Abbreviations.**

s.d.: standard deviation, VA: visual acuity, LogMar: the logarithm of the minimum angle of resolution, MD: mean deviation, IVF: integrated visual field, TD: total deviation, MVC: motor vehicle collision, Person parameter: Rasch analysis derived index of paying attention to avoid traffic accident.

doi:10.1371/journal.pone.0115572.t002



**Table 3.** Exact IVF-TD values of MVC+ and MVC- groups.

|           |           |           |            |            |           |           |           |
|-----------|-----------|-----------|------------|------------|-----------|-----------|-----------|
|           |           | -0.5(2.4) | -0.7(2.6)  | -0.7(2.7)  | -0.9(3.0) |           |           |
|           |           | -0.5(3.3) | -0.6(3.7)  | -0.7(4.4)  | -1.5(5.8) |           |           |
|           |           | 0.98      | 0.98       | 0.98       | 0.98      |           |           |
|           | -0.8(3.4) | -1.2(2.5) | -9.9(12.7) | -8.0(10.6) | -2.2(4.6) | -1.9(4.7) |           |
|           | -0.5(3.9) | -0.8(3.9) | -4.4(9.6)  | -6.8(11.2) | -2.0(6.8) | -1.7(6.3) |           |
|           | 0.98      | 0.98      | 0.32       | 0.98       | 0.98      | 0.98      |           |
| -0.6(2.5) | -0.8(3.0) | -1.5(5.5) | -0.8(3.6)  | -3.4(7.2)  | -2.6(6.7) | -1.7(5.0) | -1.8(4.3) |
| -0.4(3.4) | -0.6(4.1) | -0.8(4.4) | -0.3(2.3)  | -2.4(6.5)  | -2.5(7.1) | -2.3(7.1) | -1.9(6.9) |
| 0.98      | 0.98      | 0.98      | 0.98       | 0.98       | 0.98      | 0.98      | 0.98      |
| -0.6(2.5) | -1.6(3.4) | -2.2(6.9) | -0.2(2.3)  | -2.4(7.7)  | -4.1(8.9) | -2.8(5.6) | -1.6(4.9) |
| -0.5(3.6) | -0.7(3.2) | -1.2(4.9) | -0.2(3.4)  | -1.8(6.3)  | -2.7(7.4) | -2.8(7.4) | -2.5(7.4) |
| 0.98      | 0.98      | 0.98      | 0.98       | 0.98       | 0.98      | 0.98      | 0.98      |
| -0.4(2.4) | -1.4(3.5) | -2.2(6.9) | -0.3(1.8)  | -1.8(6.6)  | -4.4(9.2) | -3.0(6.3) | -2.3(5.5) |
| -0.3(3.6) | -0.7(3.3) | -1.0(4.3) | 0.1(2.0)   | -1.3(5.4)  | -2.4(6.5) | -2.6(6.9) | -2.5(6.8) |
| 0.98      | 0.98      | 0.98      | 0.98       | 0.98       | 0.98      | 0.98      | 0.98      |
| -0.3(3.0) | -0.6(2.5) | -1.9(5.9) | -0.8(2.1)  | -2.9(7.0)  | -3.5(8.3) | -2.0(4.9) | -1.6(4.5) |
| -0.1(3.7) | -0.1(2.7) | -0.7(4.0) | -0.4(2.8)  | -2.1(6.5)  | -2.6(6.6) | -2.2(6.0) | -2.1(6.3) |
| 0.98      | 0.98      | 0.98      | 0.98       | 0.98       | 0.98      | 0.98      | 0.98      |
|           | -0.3(2.3) | -0.9(3.2) | -8.0(12.2) | -8.3(12.6) | -2.3(5.2) | -1.6(4.8) |           |
|           | -0.1(2.6) | -0.4(2.8) | -7.1(10.9) | -7.9(11.3) | -2.0(5.6) | -1.5(5.2) |           |
|           | 0.98      | 0.98      | 0.98       | 0.98       | 0.98      | 0.98      |           |
|           |           | -0.5(2.4) | -0.9(2.6)  | -1.8(5.5)  | -0.9(3.5) |           |           |
|           |           | -0.4(3.2) | -0.6(3.5)  | -1.2(4.4)  | -1.4(5.0) |           |           |
|           |           | 0.98      | 0.98       | 0.98       | 0.98      |           |           |

Upper row in each grid represents mean (standard deviation) value in MVC+ group, middle row represents those in MVC- group and bottom row shows the value obtained by comparing two groups using the unpaired t-test with Benjamini's correction [44].

Abbreviations.

IVF: integrated visual field, MVC: motor vehicle collisions.

IVF-TD, Integrated visual field-total deviation, MVCs, motor vehicle collisions.

doi:10.1371/journal.pone.0115572.t003

none of the lower CIs of these eigenvalues (0.02 to 1.7) exceeded the critical value of 2.0. There was not a significant relationship between MVC and the Rasch derived-Person parameters (logistic regression,  $p=0.15$ ). On the other hand, there was a significant relationship between the Rasch-derived person parameter (summarizing attitudes during driving) and IVF MD ( $Y = -0.07 \cdot X - 1.47$ ,  $R^2=0.023$ ,  $p=0.0095$ ), where a larger Rasch-derived person parameter value represents a more careful driving attitude; see Fig. 1.

There was not a significant relationship between the IVFMD and the distance driven by a patient in a week (Pearson's correlation,  $p=0.87$ ). MVC was significantly positively correlated with the distance driven by a patient in a week (logistic regression,  $p=0.005$ ). Conversely, there was not a significant relationship between the Rasch derived-Person parameter and the distance driven (Pearson's  $R^2=0.009$ ,  $p=0.08$ ).

## Discussion

In the current study, history of MVCs was investigated in 247 patients with POAG, according to driving attitudes and habits (including distance driven in a

**Table 4.** Cumulative proportion of variance and the coefficients of variance of the principal components in the polynomial logistic analysis against a previous history of MVCs.

| PCA Components | Cumulative proportion of variance | coefficients | p value |
|----------------|-----------------------------------|--------------|---------|
| 1              | 46.9%                             | 0.01         | 0.82    |
| 2              | 58.9%                             | -0.06        | 0.30    |
| 3              | 64.5%                             | -0.11        | 0.33    |
| 4              | 68.9%                             | 0.07         | 0.58    |
| 5              | 72.8%                             | -0.16        | 0.18    |
| 6              | 76.1%                             | 0.04         | 0.76    |
| 7              | 78.3%                             | -0.10        | 0.53    |
| 8              | 80.2%                             | 0.03         | 0.86    |
| 9              | 81.9%                             | 0.31         | 0.09    |
| 10             | 83.5%                             | -0.25        | 0.15    |
| 11             | 84.8%                             | 0.00         | 0.99    |
| 12             | 86.0%                             | 0.15         | 0.47    |
| 13             | 87.2%                             | -0.01        | 0.98    |
| 14             | 88.2%                             | 0.38         | 0.09    |
| 15             | 89.1%                             | -0.18        | 0.48    |
| 16             | 89.9%                             | -0.19        | 0.45    |
| 17             | 90.7%                             | 0.28         | 0.29    |

Cumulative variance reached 90% with 17 principal components. None of these 17 principal components was significantly correlated with the MVC in the polynomial logistic regression analysis.

Abbreviations.

PCA: principal component analysis.

doi:10.1371/journal.pone.0115572.t004

week) as well as IVF measurements. As a result, there was not a significant relationship between MVCs and IVF MD. In Japan, drivers drive on the left side of the road, however none of the TD values were significantly different between patients with MVCs and without MVCs. None of the principal components (derived from 52 IVF TD values, better and worse eye VAs, age and gender) were related to a history of MVCs. On the other hand, as we would expect, history of MVCs was significantly positively correlated with the distance a patient drives in a week. Patients' attitudes towards driving were analyzed using Rasch analysis. Interestingly, there was a significant relationship between the Rasch derived-Person parameter and IVF MD, suggesting that patients became more careful as their IVF progresses; however, there was not a significant relationship between the Rasch-derived Person parameter and the distance driven in a week.

Previous reports have investigated the relationship between MVCs and glaucoma patients' binocular VFs. Johnson and Keltner screened more than 10,000 subjects with automated perimetry, and reported that the accident rate in subjects with binocular VF damage was twice as high compared with age-sex matched controls ( $p < 0.005$ ), but was not significant higher in subjects with monocular VF damage ( $p > 0.2$ ) [45]. Also, Szyk et al. evaluated the association between driving performance using a driving simulator and peripheral VF damage, as measured with Goldmann kinetic perimetry. In their study, the



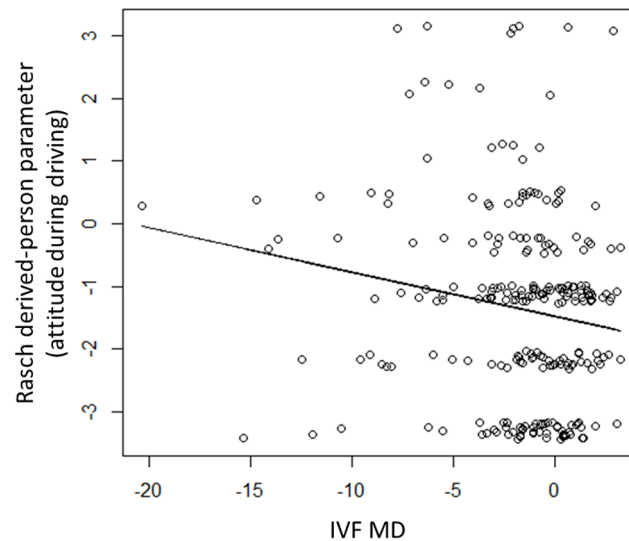

**Fig. 1. The relationship between the Rasch-derived person parameter (attitudes towards driving) and IVF MD.** There was a significant relationship between the Rasch-derived person parameter (attitudes towards driving) and IVF MD ( $Y = -0.07 \cdot X - 1.47$ ,  $R^2 = 0.023$ ,  $p = 0.0095$ ). A larger Rasch-derived person parameter value represents a more careful driving attitude. The 'jitter' function in the statistical programming language R (ver. 2.15.1, The R Foundation for Statistical Computing, Vienna, Austria) was used to aid interpretation of the scatter plot. Abbreviation. Rasch-derived person parameter: Rasch analysis derived driver's attitude based on the questionnaires of whether they avoid driving at night, in rain, in fog, on highways, high-speed driving, lane changing, driving close to the car in front. IVF MD: integrated visual field mean deviation.

doi:10.1371/journal.pone.0115572.g001

horizontal extent of patients' binocular VFs had a significant correlation with simulator accidents ( $\rho = -0.47$ ,  $p = 0.01$ ); glaucoma subjects with at least 170 degrees of horizontal VF had no simulator accidents, while more than half of subjects with less than 170 degrees of horizontal VF experienced simulator accidents. No significant correlation was observed between accidents in the driving simulator and the horizontal extent of the VF in the better eye [46]. The fact that the findings in these previous studies are inconsistent with the results of our study could be attributed to the difference in the VF tests. Our study evaluated patients' central VFs using the 24-2 test pattern, on the contrary, Johnson et al. evaluated 100 degrees in the horizontal direction (40 degree on the nasal side and 60 degrees on the temporal side) while Szyk et al. used Goldmann perimetry. Thus, the current study suggests that a patient's binocular central IVF, obtained from 24-2 VFs is not related to MVC; however, in a different sample of patients with different VF defects, IVF damage may be associated with MVCs. Further studies should be carried out to investigate this possibility. Only static automated perimetry was measured in the current study as this is most frequently used in the current clinical settings, hence it was not possible to compare the current results with these previous studies. A future study in which Goldman perimetry and static automated perimetry measurements are included should be carried out so that the relevance of these measurements against MVC is compared.

In glaucoma, VF defects are usually primarily located in a superior or inferior hemifield, and hence there could be a “washout” effect due to the presence of significant VF defects that are in opposite hemifields between patients. Therefore, we divided the studied population into two groups: superior hemifield dominant and inferior hemifield dominant groups. Then, the relationship between MVC and 17 PCA components were analyzed using the generalized mixture logistic regression, instead of the polynomial logistic regression analysis, in which the effect of the different groups is considered. As a result, none of the PCA components were significantly related to MVC ( $p > 0.05$ ): results not shown. Similarly we divided the patients into four groups: superior-right, superior-left, inferior-right and inferior-left dominant groups, followed by the generalized mixture logistic regression for the four groups. Again none of the PCA components were significantly related to MVC ( $p < 0.05$ ): results not shown. Thus removing the ‘washout’ effect still did not reveal positive relationship between visual field data and MVC.

One explanation for finding no relationship between patients’ binocular central VFs and MVCs may be that patients can compensate for central VF damage during driving using eye movements. Crabb et al. investigated eye movements, using an eye tracker, in nine glaucoma patients (mean MD was  $-8.9$  dB in the worse eye across all patients) and ten age-matched controls undergoing a driving hazard perception test (HPT) [13]. While undertaking the HPT, it was observed whether drivers slowed down or changed lanes when they realized a hazardous target, such as an oncoming cyclist or a pedestrian unexpectedly crossing the street. Crabb et al. found that the average duration of saccade eye movement and fixation was longer in glaucoma patients compared with the control subjects. They hypothesize that subjects with glaucoma use saccadic eye movement as a means of compensation for VF loss, as clearly demonstrated by an example case in the paper [13]. The study is supported by a different paper which also suggest eye movements compensate during driving [47]. Thus, it is possible that the glaucoma patients in our study use eye movements to compensate for VF damage, and as a result, do not experience a significantly larger number of MVCs.

Driving is clearly a complicated task, and is affected by many different things. Murata et al. evaluated the relationship between binocular VF test points and decreased vision related quality of life (QOL), and revealed that certain areas of the VF are more important for different tasks in daily life. For example, the peripheral superior and inferior areas of the left hemifield are more important for reading and writing, while the peripheral, mid-peripheral and para-central inferior regions tend to be more important for walking. Driving is obviously a very involved task – drivers frequently need to turn their heads, be aware of hazards as well as focus on their future direction [48]; age [49], physiological disabilities as well as mental status (such as drowsiness) will have an influence on driving performance. Moreover, drivers are aware that making a mistake during driving can cause an accident or even a fatality. Therefore, detecting hazards by saccadic eye- and head- movements [50] is much more important in driving than in other tasks such as reading and writing. Further studies should investigate the

possibility that patients with glaucomatous VF damage attempt to avoid MVCs by driving more carefully than people without VF damage; such a study could be based on the experience of patients in a driving simulator.

The distance a patient drives per week was not associated with the Rasch derived-Person parameter. This is probably because there are many other confounding factors, such as subjects' occupations and access to public transportation. On the other hand, driving distance was significantly associated with the occurrence of MVCs. This would suggest that people do not decide the distance they drive based on their central binocular vision, and moreover that history of MVCs is simply a function of driving distance.

Patients' IVFs were constructed using the better sensitivity method [16–19]. In other words, a patient's worse VF sensitivity is ignored at all locations. Consequently the IVF may not be ideal for predicting MVCs in a given patient; some previous studies have suggested that there is a relationship between MVCs and the VF of a patient's worse eye, but not the VF of their better eye. McGwin et al. compared the prevalence of MVCs between 120 subjects with glaucomatous VF damage and 120 controls. In this study, they found that a severe VF defect (based on an AGIS score between 12–20) in the better eye did not significantly increase the risk of MVCs (odds ratio 3.2, 95% CI 0.9–10.4); however, in patients with even moderate VF defects (an AGIS score between 6–11), the worse eye significantly increased the risk of MVCs (OR 3.6, 95% CI 1.4–9.4 and OR 4.4, 95% CI 1.6–12.4, respectively) [8]. Furthermore, Tanabe et al. showed that in POAG subjects with severe VF defects in the worse eye (MD less than  $-10$  dB), there was approximately a nine times increase in the likelihood of MVCs [51]. In addition, Haymes et al. evaluated driving performance in glaucoma subjects and controls based on a real-world driving exercise (under the supervision of a licensed driving instructor). In this study, worse eye MD was significantly associated with the instructor's overall rating of driving performance ( $r=0.66$ ,  $p=0.002$ ); however, better eye MD ( $r=0.41$ ,  $P=0.08$ ) and HFA binocular Estermann score ( $r=0.30$ ,  $p=0.019$ ) were not significantly associated with the overall rating [6]. Indeed, binocular visual summation is a result of binocular rivalry in which visual cortex perception is longer in the dominant eye [52], which is not considered in the simple 'best sensitivity' IVF model [16]. Nevertheless, the IVF is an established method for predicting binocular sensitivity [17] and has been used in many previous studies [53–58]; it may be appropriate to apply this model in 'non-urgent' tasks in daily life, such as reading and writing. However, the influence of the non-dominant eye requires further investigation; it may be associated with worse sensitivity in the binocular comparison, delaying visual perception in 'dynamic' tasks, such as driving. Nonetheless, there was not a significant difference in the distribution of glaucoma severity of better and worse eyes in the current study.

There was a significant difference in the better eye VA between the MVC+ and MVC- groups; however, logistic regression analysis did not suggest a significant relationship between better eye VA and MVCs. Thus, the risk of MVCs does not increase in proportion to the deterioration in better eye VA. Furthermore, none of

the principal components from PCA (which included better eye VA) were significantly related to the MVC outcome. It should be noted, however, that most patients' VAs were preserved in the current study; hence further investigations should be carried out to explore the relationship between better eye VA and MVCs, such as seeking a cut-off value of better eye VA.

One of the clear limitations of our study was the reliance on self-reported patient interviews about their history of MVCs, especially because this may have resulted in recall bias [59]: glaucoma patients who have been followed for a long time by the same doctor may hesitate to provide a full history of MVCs. However, we would expect that this influence would be somewhat limited as Marottoli et al. have reported that self-reported MVCs provide sufficient information to assess car accidents, when compared to state-reported MVCs [60]. Another limitation of our study is that visual function data were obtained after MVCs had occurred; the longest possible interval between visual function data and MVCs is 5 years, which is sufficiently long that subjects' VF defects may have worsened during that period.

## Conclusions

In this study, MVCs were not related to POAG patients' central binocular visual fields. This result suggests that the relationship between visual function and driving is not straightforward and careful consideration should be given when predicting patients' driving ability from their IVF, especially when revoking driving licenses from occupational drivers and from patients who live in areas where there is no alternative transportation.

## Supporting Information

**S1 Table. Reasons for excluding.** Abbreviation: POAG: primary open angle glaucoma.

[doi:10.1371/journal.pone.0115572.s001](https://doi.org/10.1371/journal.pone.0115572.s001) (DOC)

**S1 Data. Analyzed data (xlsx).**

[doi:10.1371/journal.pone.0115572.s002](https://doi.org/10.1371/journal.pone.0115572.s002) (XLSX)

## Acknowledgments

The authors are grateful to Dr. Sachiko Tanabe, Dr. Takeshi Ono, Dr. Masaru Shimoyama, Dr. Kazumi Fukagawa, Dr. Naoki Ozeki, Dr. Daisuke Shiba, Dr. Joji Tanabe, and Dr. Naohiko Tanabe for their help with data collection.

## Author Contributions

Conceived and designed the experiments: KY RA. Performed the experiments: KY. Analyzed the data: KY RA. Contributed reagents/materials/analysis tools: KY. Wrote the paper: KY RA KT.

## References

1. **Quigley HA** (2011) Glaucoma. *Lancet* 377: 1367–1377.
2. **Coleman AL, Miglior S** (2008) Risk factors for glaucoma onset and progression. *Surv Ophthalmol* 53: S3–10.
3. **Transportation: Motor Vehicle Accidents and Fatalities**. Table 1103. Motor Vehicle Accidents-Number and Deaths: 1990-2009. NW: U.S. Department of commerce. Available: <http://www.census.gov/compendia/statab/2012/tables/12s1103.pdf>. Accessed 2014 Apr 19.
4. **Haymes SA, Leblanc RP, Nicoleta MT, Chiasson LA, Chauhan BC** (2007) Risk of falls and motor vehicle collisions in glaucoma. *Invest Ophthalmol Vis Sci* 48: 1149–1155.
5. **Bowers A, Peli E, Elgin J, McGwin G Jr, Owsley C** (2005) On-road driving with moderate visual field loss. *Optom Vis Sci* 82: 657–667.
6. **Haymes SA, LeBlanc RP, Nicoleta MT, Chiasson LA, Chauhan BC** (2008) Glaucoma and on-road driving performance. *Invest Ophthalmol Vis Sci* 49: 3035–3041.
7. **Ramulu P** (2009) Glaucoma and disability: which tasks are affected, and at what stage of disease? *Curr Opin Ophthalmol* 20: 92–98.
8. **McGwin G Jr, Xie A, Mays A, Joiner W, DeCarlo DK, et al.** (2005) Visual field defects and the risk of motor vehicle collisions among patients with glaucoma. *Invest Ophthalmol Vis Sci* 46: 4437–4441.
9. **Kotecha A, O’Leary N, Melmoth D, Grant S, Crabb DP** (2009) The functional consequences of glaucoma for eye-hand coordination. *Invest Ophthalmol Vis Sci* 50: 203–213.
10. **Black AA, Wood JM, Lovie-Kitchin JE, Newman BM** (2008) Visual impairment and postural sway among older adults with glaucoma. *Optom Vis Sci* 85: 489–497.
11. **Coleman AL, Cummings SR, Ensrud KE, Yu F, Gutierrez P, et al.** (2009) Visual field loss and risk of fractures in older women. *J Am Geriatr Soc* 57: 1825–1832.
12. **Murata H, Hirasawa H, Aoyama Y, Sugisaki K, Araie M, et al.** (2013) Identifying areas of the visual field important for quality of life in patients with glaucoma. *PloS one* 8: e58695.
13. **Crabb DP, Smith ND, Rauscher FG, Chisholm CM, Barbur JL, et al.** (2010) Exploring eye movements in patients with glaucoma when viewing a driving scene. *PloS one* 5: e9710.
14. **McGwin G Jr, Mays A, Joiner W, Decarlo DK, McNeal S, et al.** (2004) Is glaucoma associated with motor vehicle collision involvement and driving avoidance? *Invest Ophthalmol Vis Sci* 45: 3934–3939.
15. **Owsley C, Stalvey B, Wells J, Sloane ME** (1999) Older drivers and cataract: driving habits and crash risk. *J Gerontol A Biol Sci Med Sci* 54: 203–211.
16. **Nelson-Quigg JM, Cello K, Johnson CA** (2000) Predicting binocular visual field sensitivity from monocular visual field results. *Invest Ophthalmol Vis Sci* 41: 2212–2221.
17. **Viswanathan AC, McNaught AI, Poinosawmy D, Fontana L, Crabb DP, et al.** (1999) Severity and stability of glaucoma: patient perception compared with objective measurement. *Arc Ophthalmol* 117: 450–454.
18. **Crabb DP, Viswanathan AC, McNaught AI, Poinosawmy D, Fitzke FW, et al.** (1998) Simulating binocular visual field status in glaucoma. *Br J Ophthalmol* 82: 1236–1241.
19. **Crabb DP, Fitzke FW, Hitchings RA, Viswanathan AC** (2004) A practical approach to measuring the visual field component of fitness to drive. *Br J Ophthalmol* 88: 1191–1196.
20. **Mills RP, Budenz DL, Lee PP, Noecker RJ, Walt JG, et al.** (2006) Categorizing the stage of glaucoma from pre-diagnosis to end-stage disease. *Am J Ophthalmol* 141: 24–30.

21. **Pearson K** (1901) On Lines and Planes of Closest Fit to Systems of Points in Space. *Philosophical Magazine*. 1901; 2: 559–572. Available: <http://stat.smmu.edu.cn/history/pearson1901.pdf>. Accessed 2014 Jul 1.
22. **Asaoka R** (2013) The relationship between visual acuity and central visual field sensitivity in advanced glaucoma. *Br J Ophthalmol* 97: 1355–1356.
23. **Zeyen TG, Zulauf M, Caprioli J** (1993) Priority of test locations for automated perimetry in glaucoma. *Ophthalmology* 100: 518–522; discussion 523.
24. **Lachenmayr BJ, Kiermeir U, Kojetinsky S** (1995) Points of a normal visual field are not statistically independent. *Ger J Ophthalmol* 4: 175–181.
25. **Suzuki Y, Araie M, Ohashi Y** (1993) Sectorization of the central 30 degrees visual field in glaucoma. *Ophthalmology* 100: 69–75.
26. **Farrar DE, Glauber RR** (1967) Multicollinearity in Regression Analysis: The Problem Revisited. *Rev Econ Stat* 49: 92–107. Available: <http://dspace.mit.edu/bitstream/handle/1721.1/48530/multicollinearity00farr.pdf> Accessed 2014 Jul 1.
27. **Khattree R, Naik DN** (2000) *Multivariate Data Reduction and Discrimination with SAS Software*. Hoboken, NJ: John Wiley & Sons.
28. **Bond TG, Fox CM** (2007) *Applying the Rasch Model: Fundamental Measurement in the Human Science*. London, UK: Lawerance Erlbaum Associates.
29. **Wright BD, Stone MH** (1979) *Best Test Design: Rasch Measurement*. Chicago: MESA Press.
30. **Wright BD, Masters G** (1982) *Rating Scale Analysis*. Chicago: MESA Press.
31. **Pesudovs K, Burr JM, Harley C, Elliott DB** (2007) The development, assessment, and selection of questionnaires. *Optom Visi Sci* 84: 663–674.
32. **Linacre JM** (2000) Item Discrimination and Infit Mean-Squares. *Rasch Measurement Transactions* 14: 743.
33. **Rasch G** (1980) *Probabilistic models for some intelligence and attainment tests*. Copenhagen, Denmark: Danish Institute for Educational Research; 1960, and Chicago: University of Chicago Press.
34. **Mallinson T** (2007) Why measurement matters for measuring patient vision outcomes. *Optom Visi Sci* 84: 675–682.
35. **Pesudovs K, Gothwal VK, Wright T, Lamoureux EL** (2010) Remediating serious flaws in the National Eye Institute Visual Function Questionnaire. *J Cataract Refract Surg* 36: 718–732.
36. **Khadka J, Pesudovs K, McAlinden C, Vogel M, Kernt M, et al.** (2011) Reengineering the glaucoma quality of life-15 questionnaire with rasch analysis. *Invest Ophthalmol Vis Sci* 52: 6971–6977.
37. **Gothwal VK, Srinivas M, Rao GN** (2013) A new look at the WHOQOL as health-related quality of life instrument among visually impaired people using Rasch analysis. *Qual Life Res* 22: 839–851.
38. **Vianya-Estopa M, Elliott DB, Barrett BT** (2010) An evaluation of the Amblyopia and Strabismus Questionnaire using Rasch analysis. *Invest Ophthalmol Vis Sci* 51: 2496–2503.
39. **Labiris G, Katsanos A, Fanariotis M, Tsirouki T, Pefkianaki M, et al.** (2008) Psychometric properties of the Greek version of the NEI-VFQ 25. *BMC Ophthalmol* 8: 4.
40. **Cochrane GM, Marella M, Keeffe JE, Lamoureux EL** (2011) The Impact of Vision Impairment for Children (IVI\_C): validation of a vision-specific pediatric quality-of-life questionnaire using Rasch analysis. *Invest Ophthalmol Vis Sci* 52: 1632–1640.
41. **McAlinden C, Skiadaresi E, Moore J, Pesudovs K** (2011) Subscale assessment of the NEI-RQL-42 questionnaire with Rasch analysis. *Invest Ophthalmol Vis Sci* 52: 5685–5694.
42. **Bond TG, Christine MF** (2007) *Applying the Rasch Model: Fundamental Measurement in the Human Science*. London: Lawerance Erlbaum Associates.
43. **Smith EV Jr** (2002) Detecting and evaluating the impact of multidimensionality using item fit statistics and principal component analysis of residuals. *J Appl Meas* 3: 205–231.
44. **Benjamini Y, Hochberg Y** (1995) Controlling the false discovery rate: a practical and powerful approach to multiple testing. *J Roy Stat Soc Series B* 57: 289–300.



45. **Johnson CA, Keltner JL** (1983) Incidence of visual field loss in 20,000 eyes and its relationship to driving performance. *Arc Ophthalmology* 101: 371–375.
46. **Szlyk JP, Mahler CL, Seiple W, Edward DP, Wilensky JT** (2005) Driving performance of glaucoma patients correlates with peripheral visual field loss. *J Glaucoma* 14: 145–150.
47. **Bronstad PM, Bowers AR, Albu A, Goldstein R, Peli E** (2013) Driving with central field loss I: effect of central scotomas on responses to hazards. *JAMA ophthalmology* 131: 303–309.
48. **Lappi O, Lehtonen E, Pekkanen J, Itkonen T** (2013) Beyond the tangent point: gaze targets in naturalistic driving. *J Vis* 13: 11.
49. **Hamel J, De Beukelaer S, Kraft A, Ohl S, Audeberh HJ, et al.** (2013) Age-related changes in visual exploratory behavior in a natural scene setting. *Front Psychol* 4: 339.
50. **Kasneci E, Sippel K, Aehling K, Heister M, Rosenstiel W, et al.** (2014) Driving with binocular visual field loss? A study on a supervised on-road parcours with simultaneous eye and head tracking. *PloS one* 9: e87470.
51. **Tanabe S, Yuki K, Ozeki N, Shiba D, Abe T, et al.** (2011) The association between primary open-angle glaucoma and motor vehicle collisions. *Invest Ophthalmol Vis Sci* 52: 4177–4181.
52. **Burian MA, Noorden V** (1980) *Physiology of the Sensorimotor cooperation of the eyes*. St. Louis, MO: Mosby.
53. **Asaoka R, Russell RA, Malik R, Garway-Heath DF, Crabb DP** (2013) Five-year forecasts of the Visual Field Index (VFI) with binocular and monocular visual fields. *Graefes Arch Clin Exp Ophthalmol* 251: 1335–1341.
54. **Asaoka R, Crabb DP, Yamashita T, Russell RA, Wang YX, et al.** (2011) Patients have two eyes!: binocular versus better eye visual field indices. *Invest Ophthalmol Vis Sci* 52: 7007–7011.
55. **Arora KS, Boland MV, Friedman DS, Jefferys JL, West SK, et al.** (2013) The relationship between better-eye and integrated visual field mean deviation and visual disability. *Ophthalmology* 120: 2476–2484.
56. **Lisboa R, Chun YS, Zangwill LM, Weinreb RN, Rosen PN, et al.** (2013) Association between rates of binocular visual field loss and vision-related quality of life in patients with glaucoma. *JAMA Ophthalmol* 131: 486–494.
57. **Black AA, Wood JM, Lovie-Kitchin JE** (2011) Inferior visual field reductions are associated with poorer functional status among older adults with glaucoma. *Ophthalmic Physiol Opt* 31: 283–291.
58. **Crabb DP, Viswanathan AC** (2005) Integrated visual fields: a new approach to measuring the binocular field of view and visual disability. *Graefes Arch Clin Exp Ophthalmol* 243: 210–216.
59. **McGwin G Jr, Owsley C, Ball K** (1998) Identifying crash involvement among older drivers: agreement between self-report and state records. *Accid Anal Prev* 30: 781–791.
60. **Marottoli RA, Cooney LM Jr, Tinetti ME** (1997) Self-report versus state records for identifying crashes among older drivers. *J Gerontol A Biol Sci Med Sci* 52: 184–187.
